# Supplementary material for: A functional role for glycosylated B7-H5/VISTA immune checkpoint protein in metastatic clear cell renal cell carcinoma
Source: PubMed Central journal article supplement — iScience. 2024 Jul 25;27(9):110587. doi: 10.1016/j.isci.2024.110587 (PMC11388181; doi:10.1016/j.isci.2024.110587), 2024-07-25

Supplementary Data S2: uncropped Western blots, Related to Figure 1B

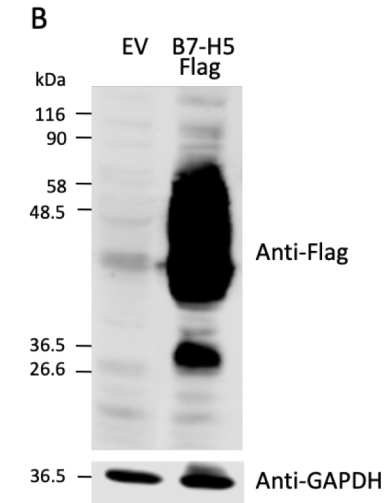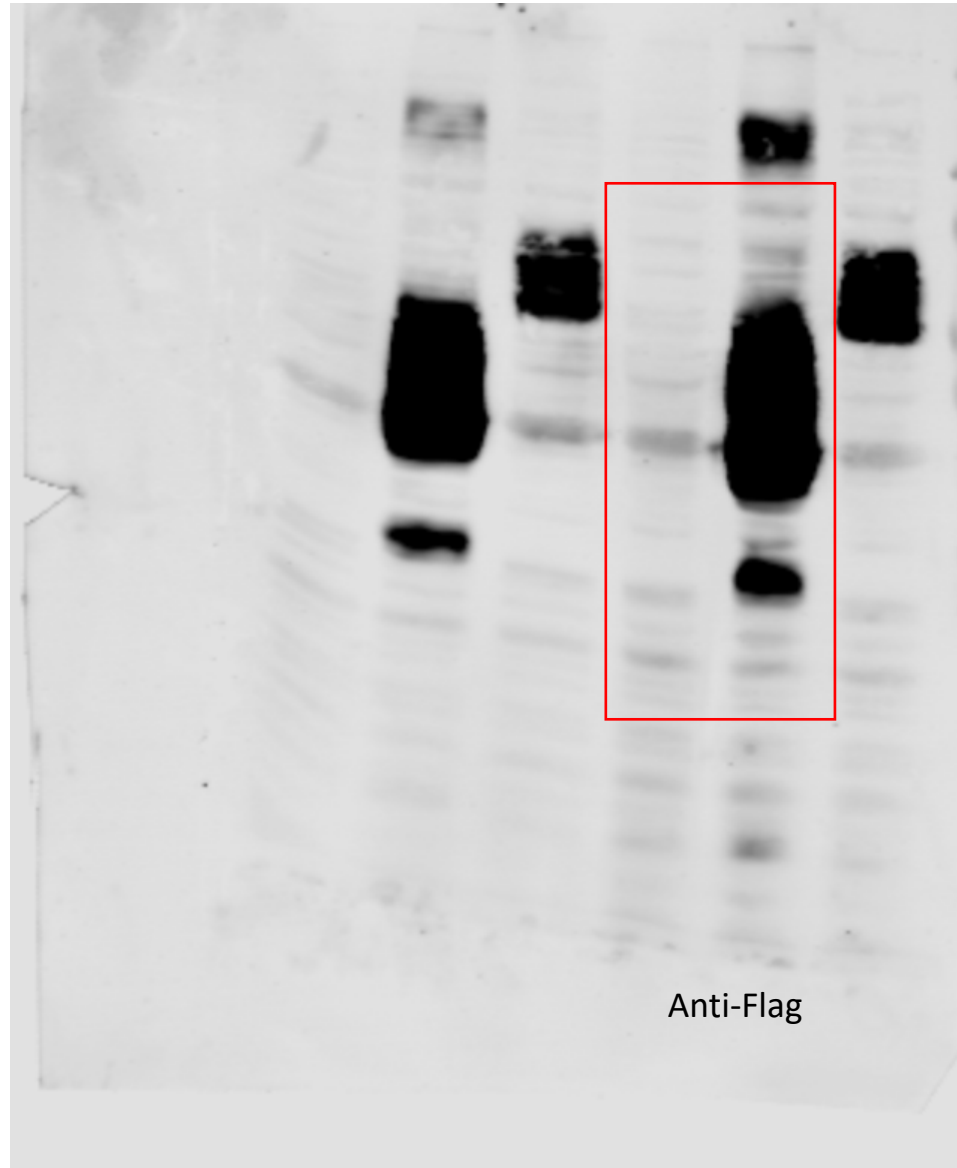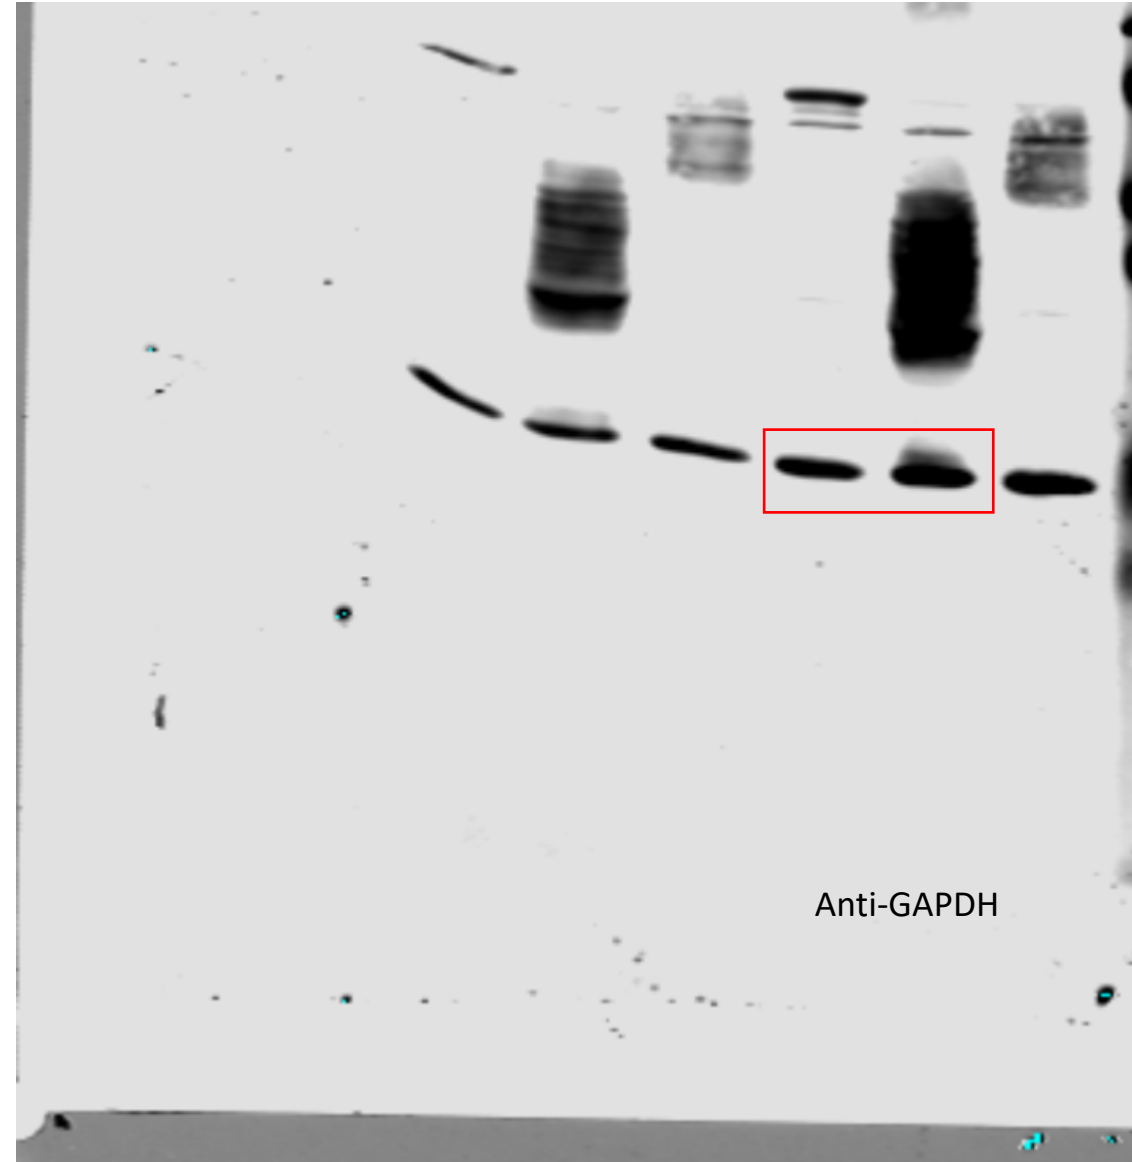

# Supplementary Data S2: uncropped Western blots, Related to Figure 1D

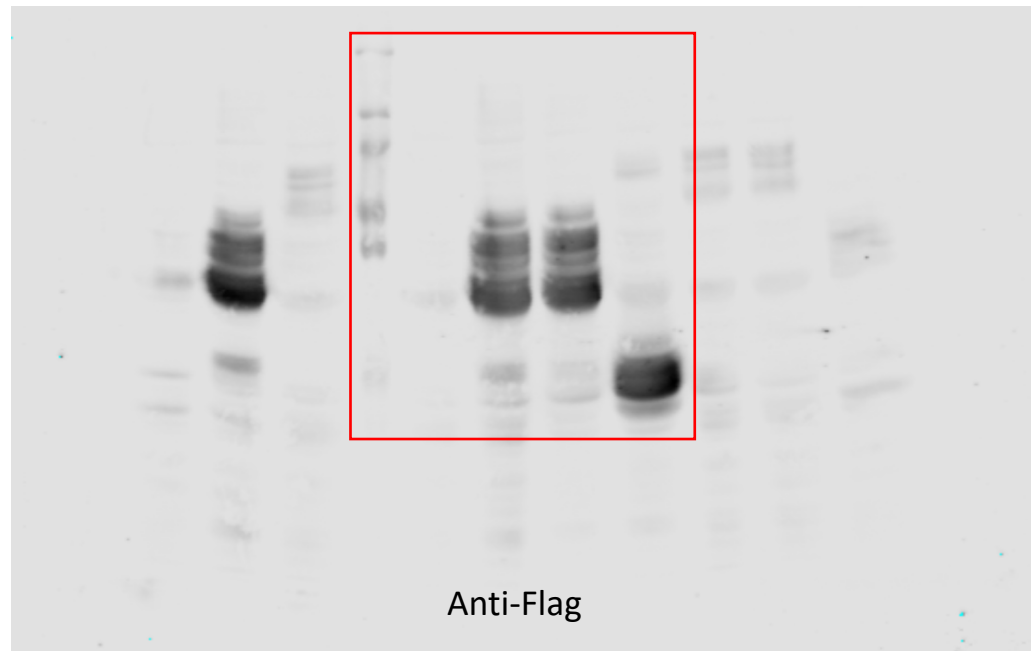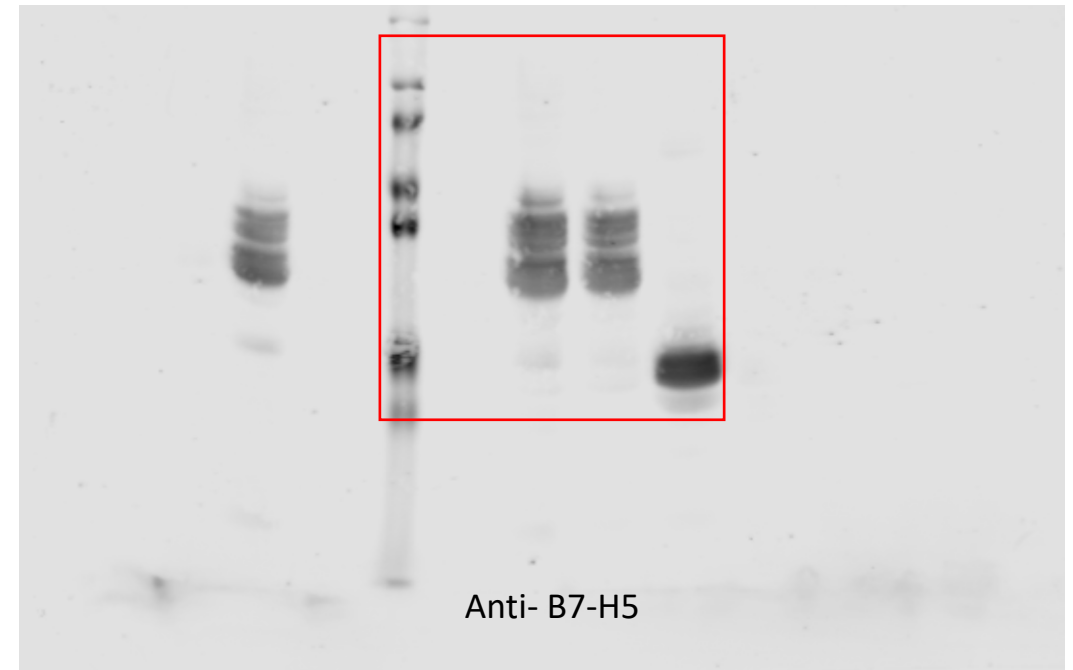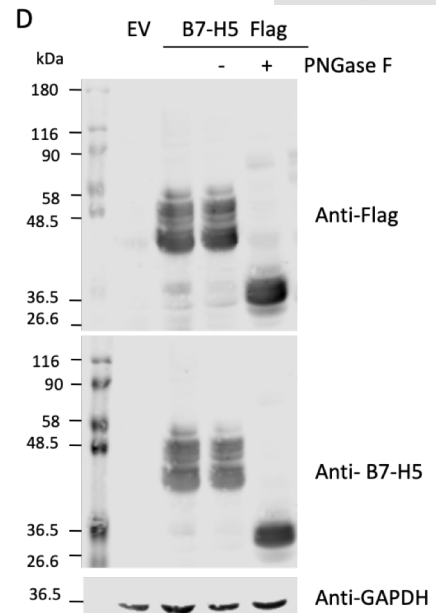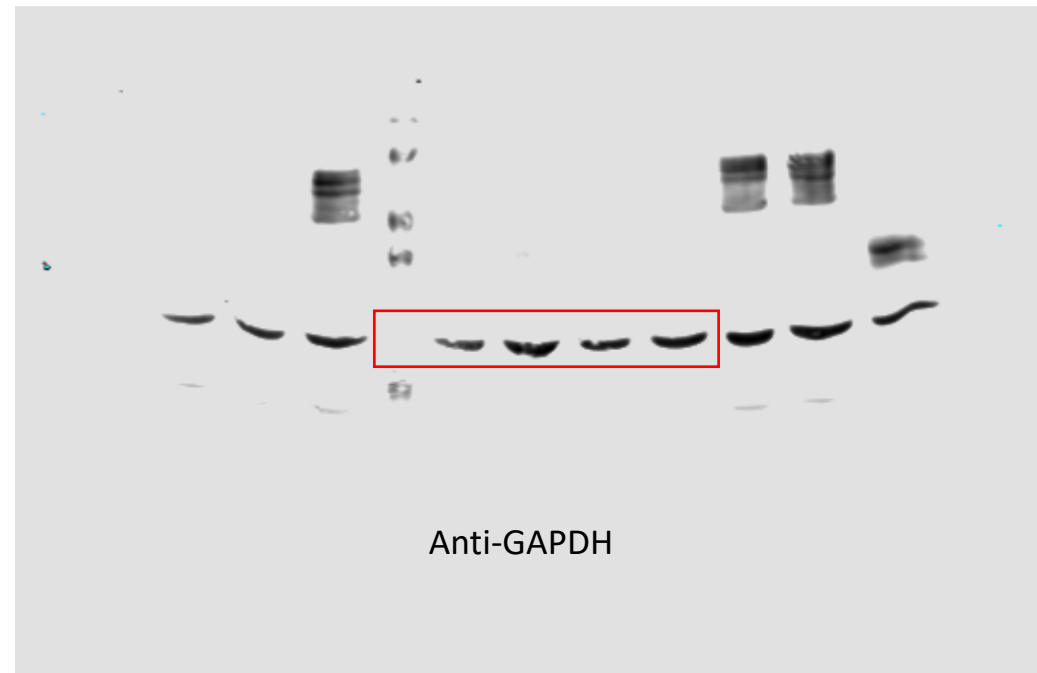

Supplementary Data S2: uncropped Western blots, Related to Figure 1E

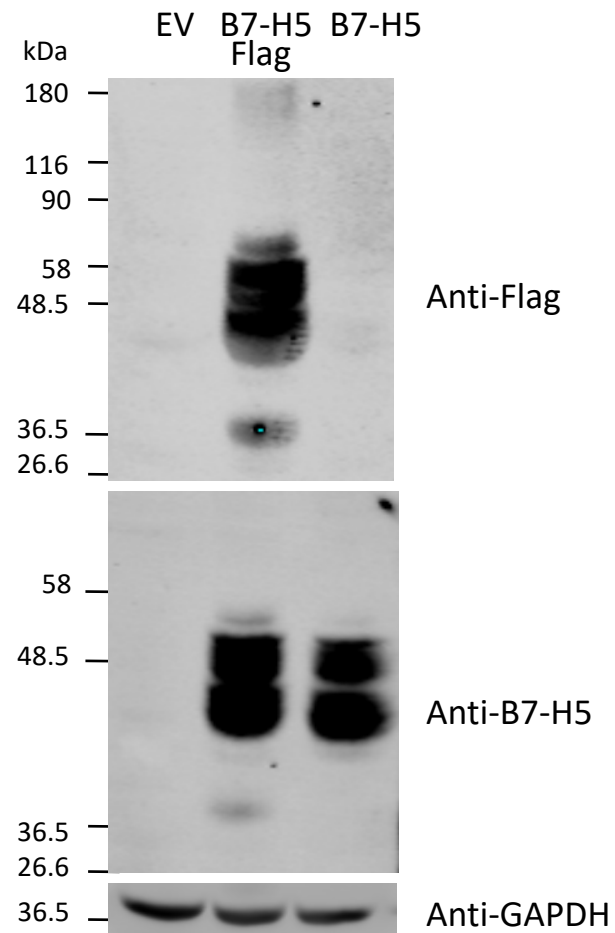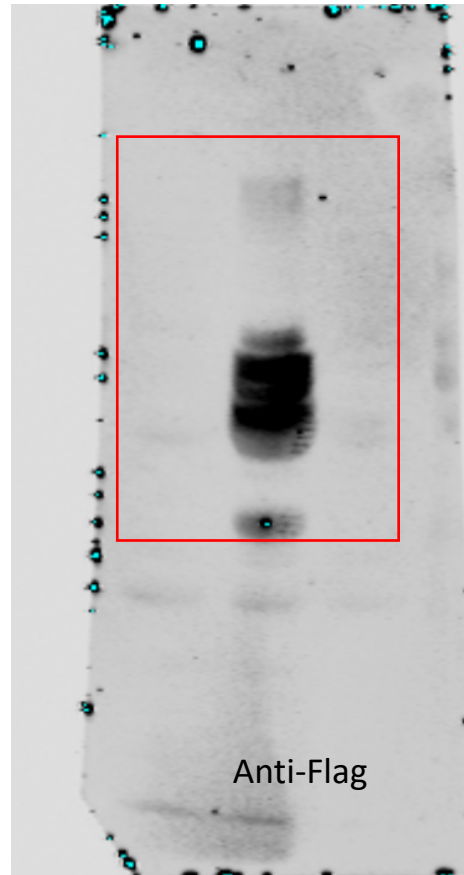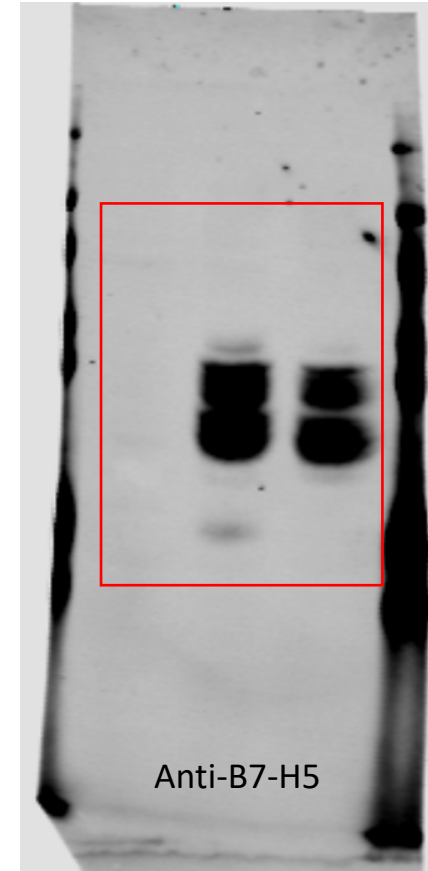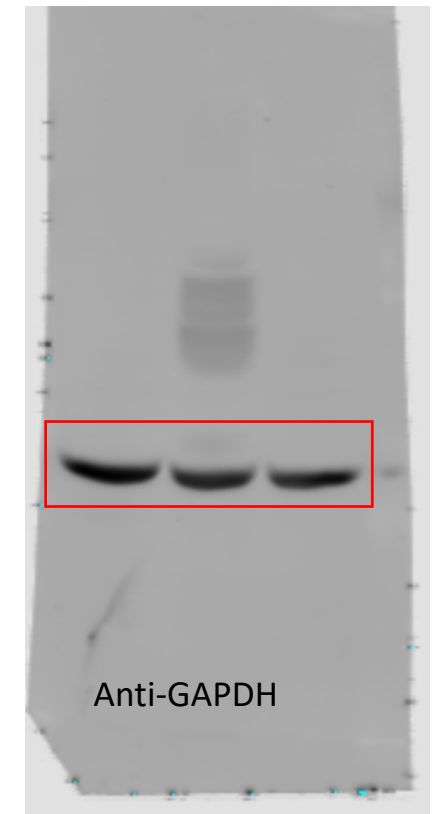

Supplementary Data S2: uncropped Western blots, Related to Figure 1F

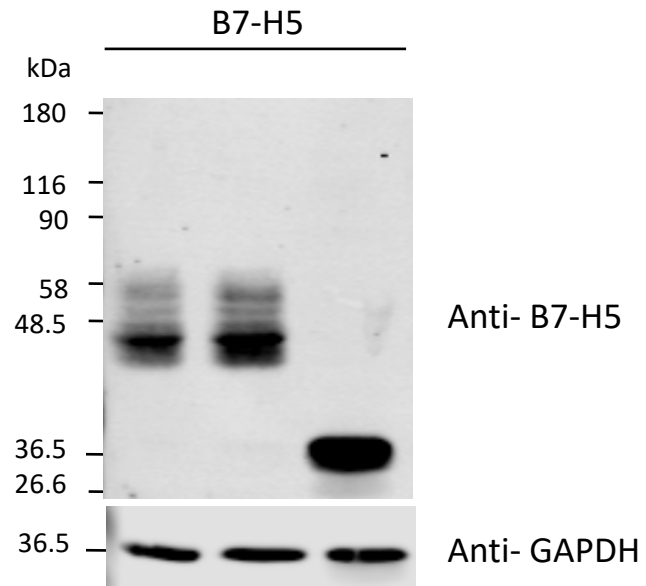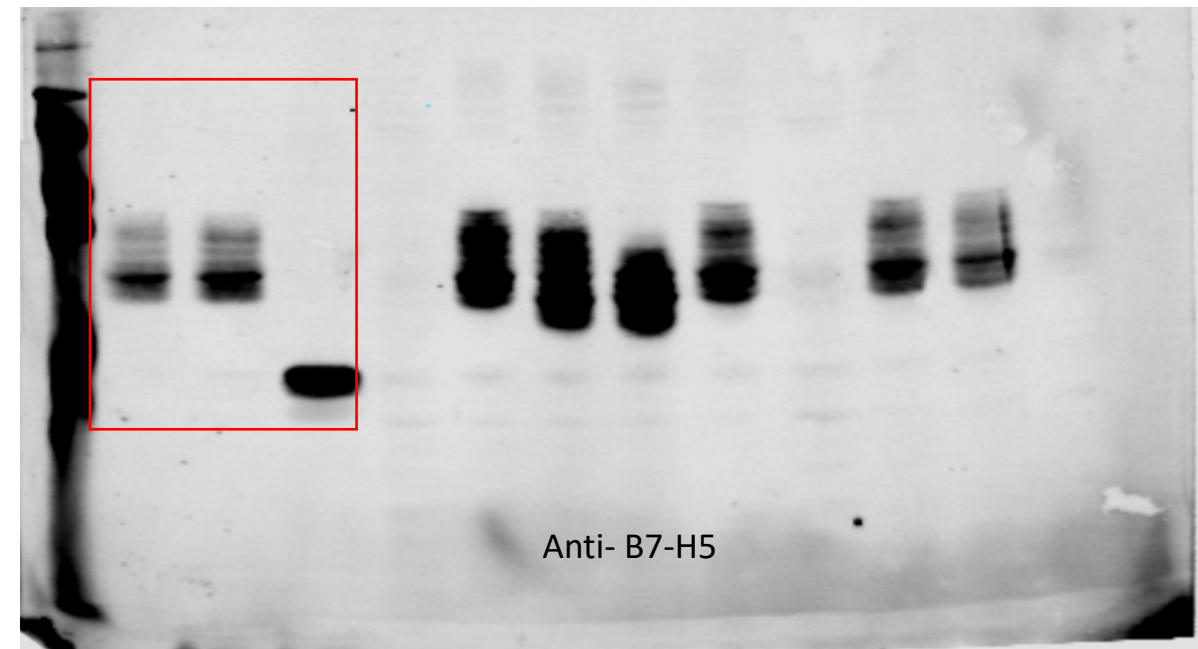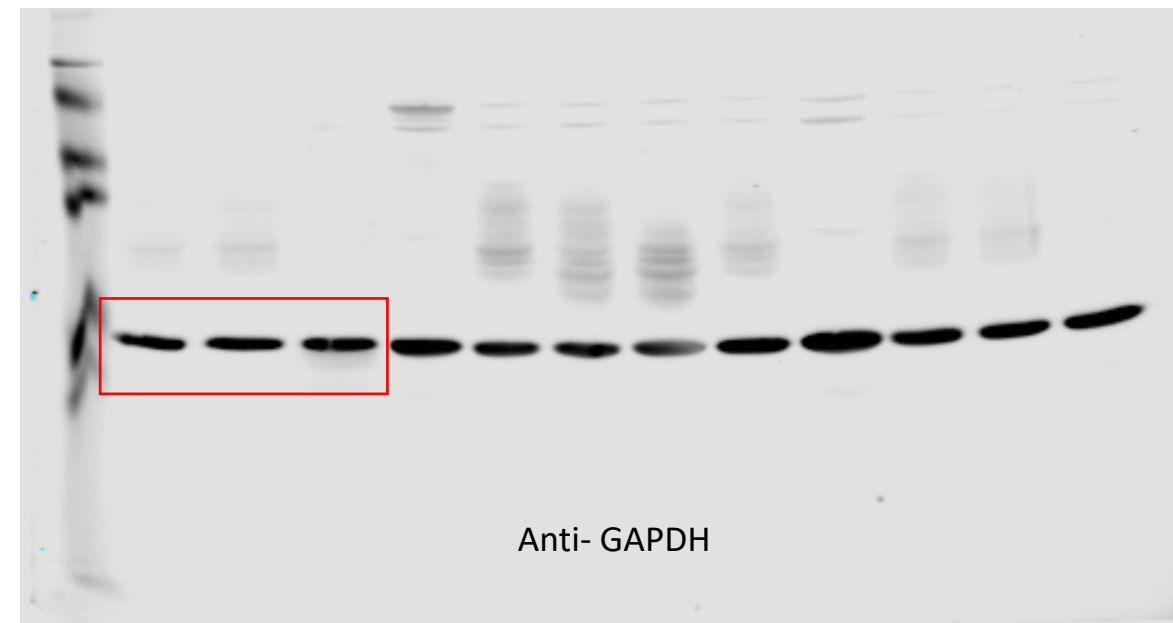

Supplementary Data S2: uncropped Western blots, Related to Figure 2C

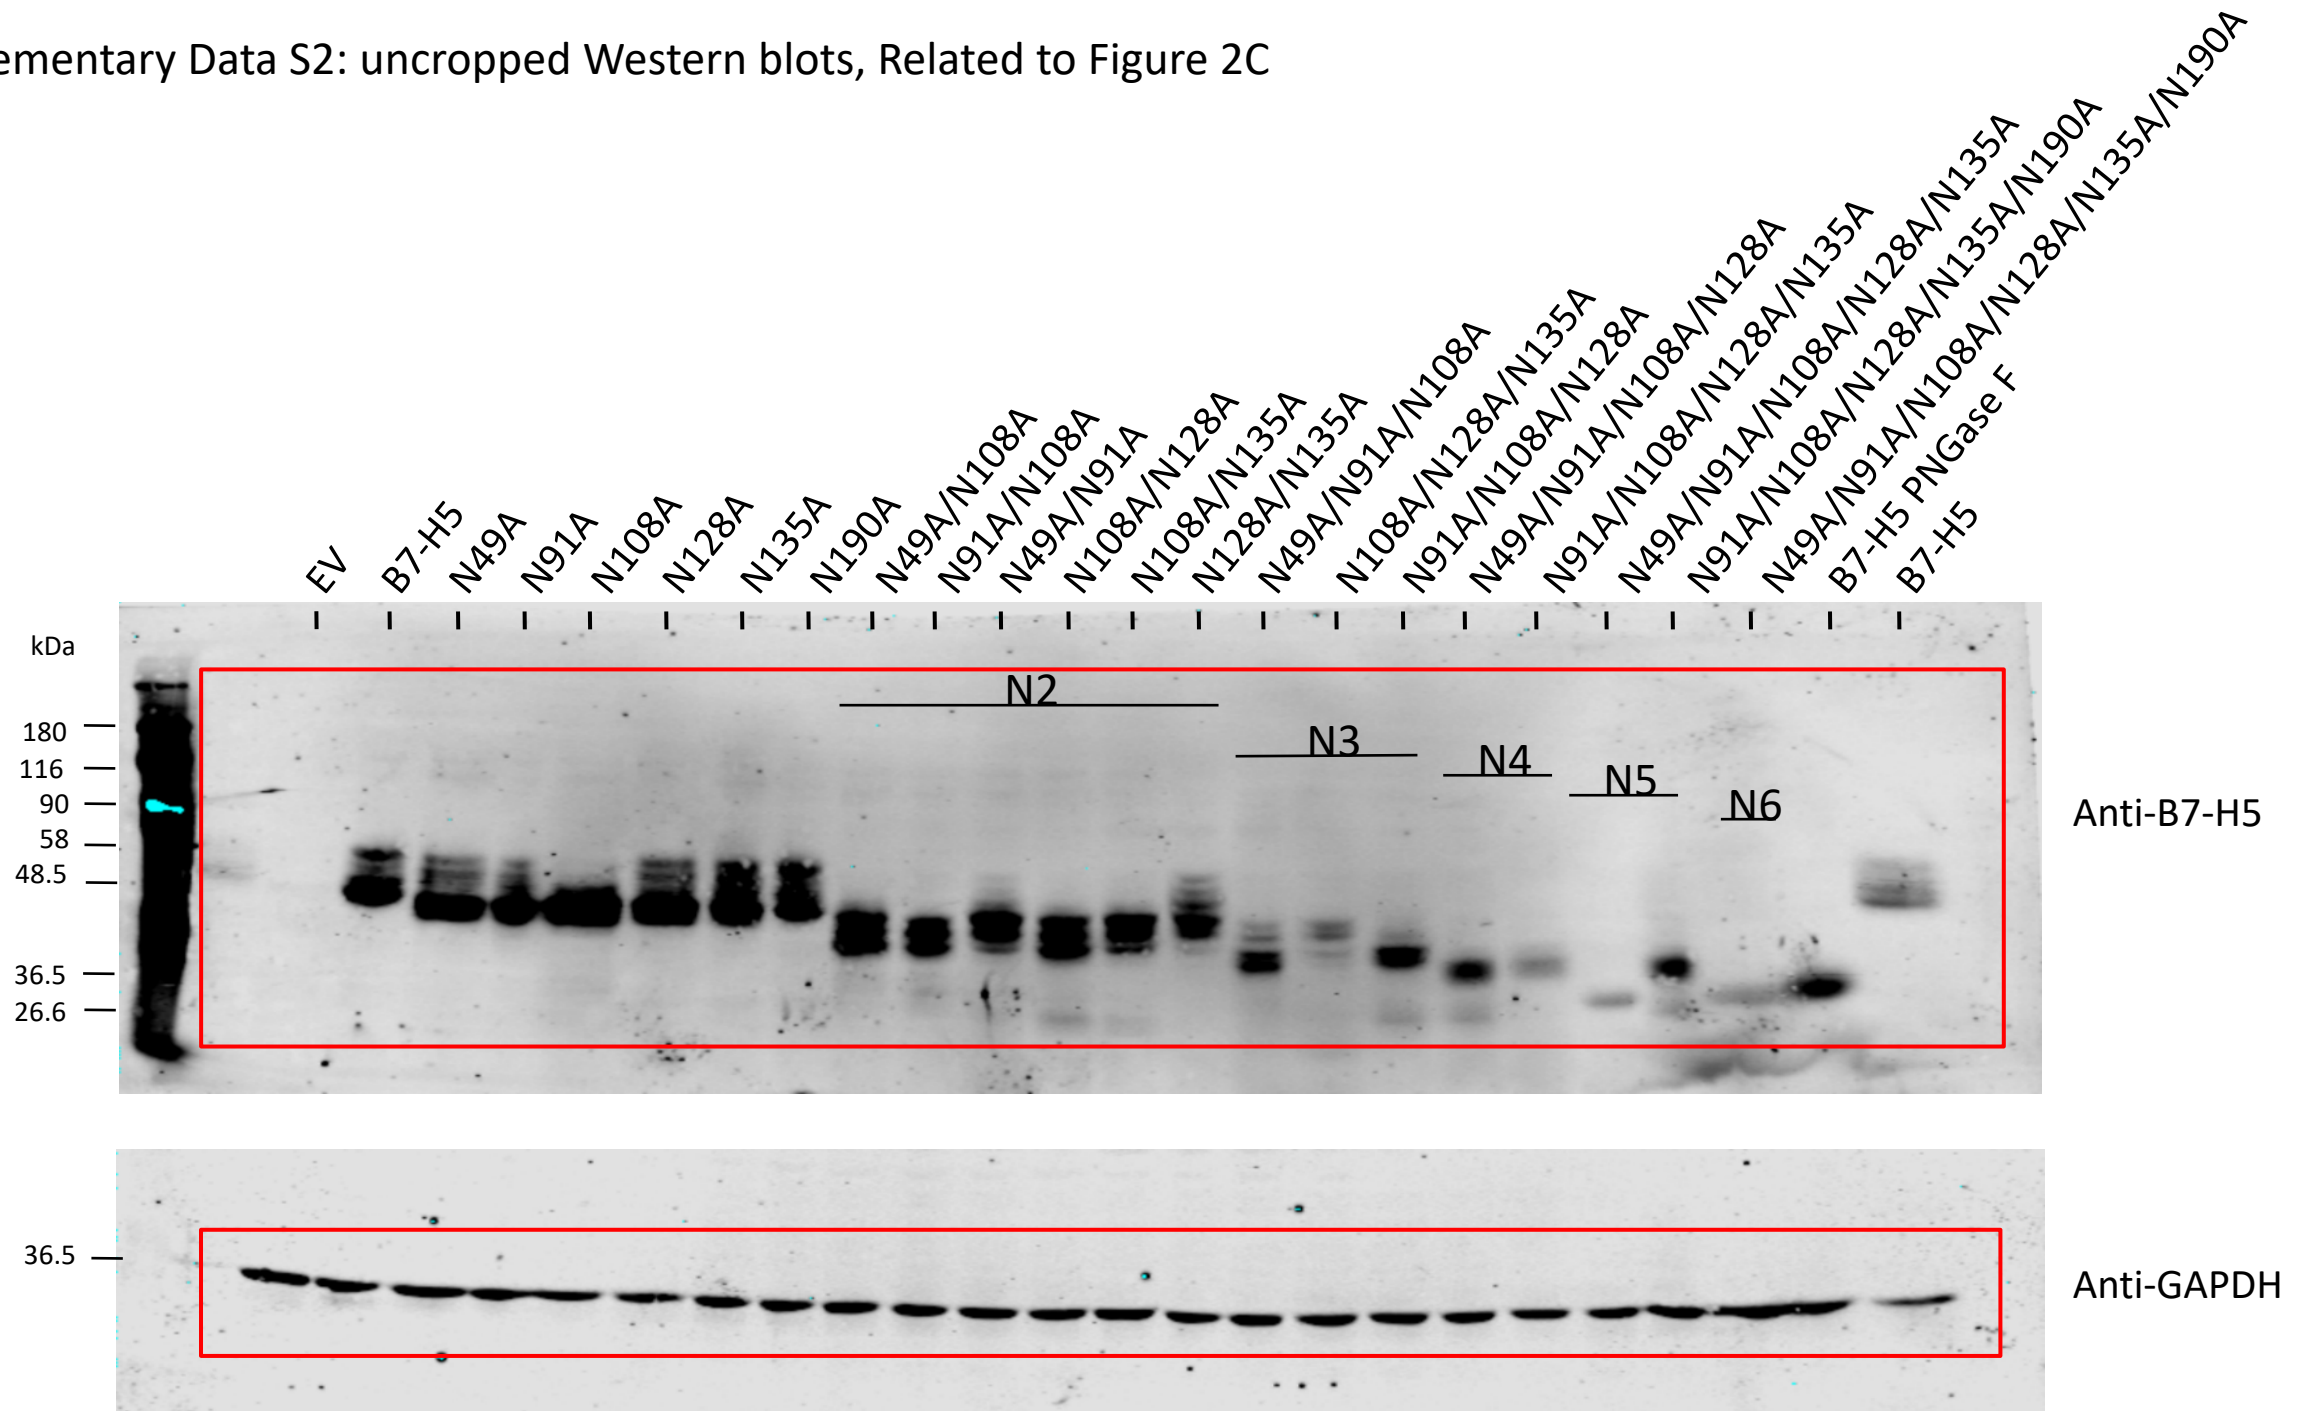

Supplement: mmc2.pdf [file mmc2.pdf]
