# Supplementary material for: A functional role for glycosylated B7-H5/VISTA immune checkpoint protein in metastatic clear cell renal cell carcinoma
Source: PubMed Central journal article supplement — iScience. 2024 Jul 25;27(9):110587. doi: 10.1016/j.isci.2024.110587 (PMC11388181; doi:10.1016/j.isci.2024.110587), 2024-07-25

iScience, Volume 27

## **Supplemental information**

### **A functional role for glycosylated B7-H5/VISTA immune checkpoint protein in metastatic clear cell renal cell carcinoma**

**Maite Emaldi, Paula Alamillo-Maeso, Esther Rey-Iborra, Lorena Mosteiro, David Lecumberri, Rafael Pulido, José I. López, and Caroline E. Nunes-Xavier**

**Supplementary Figure S1, Efficacy of B7-H5 silencing in renal cancer cells, related to Figure 4.**

**Supplementary Figure S1.** Relative fold change in gene expression of GAPDH and B7-H5 measured by RT-qPCR on A) 786-O and B) Caki-1 cells transfected with siNS (negative control), siGAPDH (positive control) and siB7-H5 #1, siB7-H5 #2, siB7-H5 #3, siB7-H5 #4. Data are presented as relative fold change  $\pm$  S.D.

**Supplementary Figure S1**

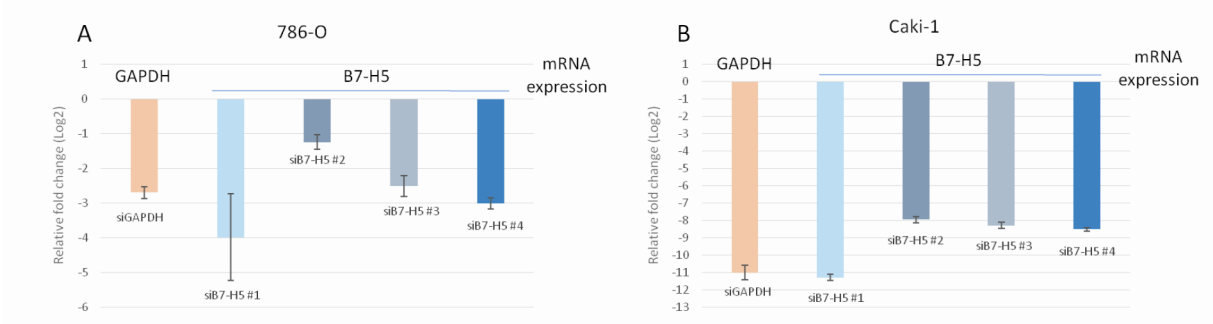

Supplement: mmc1.pdf [file mmc1.pdf]
